# Supplementary material
Source: publisher figshare collection journal article supplement (https://sage.figshare.com/ndownloader/files/22849553)
Supplement: Supplementary file 1 [file 22849553]

#### Appendix I. Data extraction: Articles included in the literature review

| Author, (year)                               | Country, Journal                                         | Setting, sample                                                            | Aims of the study                                                          | Study approach, design                                | Data collection, data analysis                                                            |
|----------------------------------------------|----------------------------------------------------------|----------------------------------------------------------------------------|----------------------------------------------------------------------------|-------------------------------------------------------|-------------------------------------------------------------------------------------------|
| Sandman et al.<br>(2008) <sup>1</sup>        | Sweden<br>Nursing Ethics                                 | Hospital, Patients (7) and Healthcare practitioners                        | Analyze ethical conflicts during nutritional refuse                        | Qualitative case study, an overview of the literature | Case vignettes, normative analysis                                                        |
| Wilmot et al.<br>(2002) <sup>2</sup>         | England<br>Nursing Ethics                                | Hospital, Nurses and Healthcare assistants (12)                            | Explore the ethical principles of dementia                                 | Qualitative, explorative                              | Focus group, grounded theory                                                              |
| Reitinger and Heimerl<br>(2014) <sup>3</sup> | Austria<br>International Journal of Older People Nursing | Nursing homes (3), Healthcare practitioners (35)                           | Highlight the ethical and gender issues, during elderly palliative care    | Qualitative, participatory action research            | Group discussion, qualitative questionnaire, thematic and narrative analysis              |
| Rodriguez and Young<br>(2006) <sup>4</sup>   | USA<br>Journal of Medical Ethics                         | Medical center, Elderly people (30) Healthcare providers (30)              | Explore the perception of futile treatment and end of life decision-making | A quantitative cross-sectional study                  | A semi-structured interview, grounded theory analysis                                     |
| Teeri et al.<br>(2006) <sup>5</sup>          | Finland<br>Nursing Ethics                                | Long-term care institution, Elderly people (10) Relatives (17), Nurses (9) | Explore ethical problems during long-term care for elderly people          | Qualitative explorative                               | Opened interviews, essay, qualitative content analysis                                    |
| Teeri et al.<br>(2008) <sup>6</sup>          | Finland<br>Nursing Ethics                                | Long-term care (4) institution, Nurses (222) and Relatives (213)           | Describe the maintenance of patient's integrity in long-term care          | Quantitative, descriptive-comparative                 | Questionnaire (Likert-type scale), Cronbach's alpha (reliability), descriptive statistics |

|                                       |                                                           |                                                                    |                                                                       |                                                     |                                                                         |
|---------------------------------------|-----------------------------------------------------------|--------------------------------------------------------------------|-----------------------------------------------------------------------|-----------------------------------------------------|-------------------------------------------------------------------------|
| Bolmsjö et al.<br>(2006) <sup>7</sup> | Sweden<br>Nursing Ethics                                  | A nursing home,<br>Elderly people (12)<br>Healthcare practitioners | Describe everyday ethical<br>issues in the care of elderly<br>people  | Qualitative,<br>nonparticipant<br>observational     | Observation, teleological<br>decision-making model,<br>content analysis |
| Tuckett<br>(2006) <sup>8</sup>        | Australia<br>International Journal<br>of Nursing Practice | Nursing home, Elderly<br>people, Nurses,<br>Healthcare Assistants  | Increasing knowledge of<br>paternalism, autonomy and<br>best interest | Literature review, review<br>of qualitative studies | Textual data, concept analysis                                          |

(continued)

**Appendix I.** (continued)

| <b>Author), (year)</b>                              | <b>Country, Journal</b>                                               | <b>Setting, sample</b>                                                             | <b>Aims of the study</b>                                                                                                | <b>Study approach,<br/>design</b> | <b>Data collection, data<br/>analysis</b> |
|-----------------------------------------------------|-----------------------------------------------------------------------|------------------------------------------------------------------------------------|-------------------------------------------------------------------------------------------------------------------------|-----------------------------------|-------------------------------------------|
| Hick<br>(2000) <sup>9</sup>                         | USA<br>Nursing Ethics                                                 | Nursing home, nurses                                                               | Presenting one pain<br>management plan                                                                                  | Literature review                 | Textual data, concept<br>analysis         |
| Baldwin et al.<br>(2002) <sup>10</sup>              | United Kingdom<br>International<br>Journal of Geriatric<br>Psychiatry | xxx                                                                                | Bibliometric analysis of keywords<br>in the literature on ethics and<br>dementia                                        | Literature review                 | Textual data, concept<br>analysis         |
| Eggenberger<br>and<br>Nelms<br>(2004) <sup>11</sup> | USA<br>Journal of Clinical<br>Nursing                                 | Nursing home, elderly<br>person (1) and<br>relatives (2), doctor<br>(1), nurse (1) | Describe the role of beneficence<br>and autonomy in artificial<br>hydration and nutrition decision<br>making in the USA | Qualitative Case study            | Hypothetical family scenario              |

|                                              |                                                            |                                                                                         |                                                                                             |                                         |                                                                                   |
|----------------------------------------------|------------------------------------------------------------|-----------------------------------------------------------------------------------------|---------------------------------------------------------------------------------------------|-----------------------------------------|-----------------------------------------------------------------------------------|
| Chernoff<br>(2006) <sup>12</sup>             | USA<br><br>Nutrition in Clinical Practice                  | Nursing home                                                                            | Describe ethical and legal issues during the tube feeding dementia patients in the USA      | Theoretical paper                       | Textual data, normative analysis                                                  |
| Cheung<br>And<br>Yam<br>(2005) <sup>13</sup> | Kingdom of Saudi Arabia<br><br>Journal of Clinical Nursing | Hospital, elderly persons (1), relatives (1), nurses, other healthcare providers        | Examine the relationship between patient autonomy and physical restraint                    | Qualitative, case study                 | Family Scenarios, content analysis                                                |
| Clarfield et al.<br>(2003) <sup>14</sup>     | Israel<br><br>Journal of American Geriatric Society        | Hospital (3)elderly people (3), relatives, Healthcare practitioners                     | Compare the opinions of three religions, related to end of life decision making             | Qualitative, comparative case study     | case vignette, normative analysis                                                 |
| Blass et al.<br>(2006) <sup>15</sup>         | USA<br><br>Journal of American Geriatric Society           | Elderly homes, elderly people, nurses                                                   | Analyzing ethical issues during the psychiatric treatment of the homebound elderly patients | Qualitative case study                  | Case vignettes, normative analysis                                                |
| Cubit<br>(2010) <sup>16</sup>                | Australia<br><br>Contemporary Nurse                        | Long-term care institutions, elderly people (8), nurses, other healthcare practitioners | Describe the obtaining of informed consent for elderly research participation               | Mixed, , survey, structured observation | Interview, group discussion, clinical audit, observation, participant observation |

(continued)

| <b>Author(s),<br/>(year)</b>                 | <b>Country, journal</b>                                                      | <b>Setting, sample</b>                                   | <b>Aims of the study</b>                                                                                     | <b>Study approach,<br/>design</b>                 | <b>Data collection, data<br/>analysis</b>                                                         |
|----------------------------------------------|------------------------------------------------------------------------------|----------------------------------------------------------|--------------------------------------------------------------------------------------------------------------|---------------------------------------------------|---------------------------------------------------------------------------------------------------|
| de Casterle et al.<br>(2014) <sup>17</sup>   | Belgium<br><br>Nursing Ethics                                                | Hospital (12)<br><br>Nurses (21)                         | Explore the influences on nurses' decision-making during physical restraint of the elderly people in Belgium | Qualitative descriptive                           | Interview, (QUAGOL) Qualitative Analysis Guide of Leuven 27, grounded theory                      |
| Elliot et al.<br>(2009) <sup>18</sup>        | USA<br><br>Scandinavian Journal of Caring Sciences                           | Nursing home (8)<br><br>Family members (39)              | Describe the ethical thinking of the relatives at the end of life decision-making in the USA                 | Qualitative research                              | Focus group, qualitative thematic analysis                                                        |
| Enes and de Vries<br>(2004) <sup>19</sup>    | UK<br><br>Nursing Ethics                                                     | Hospitals (3), care homes (10)<br><br>Nurses (153)       | Examine the ethical issues experienced by nurses                                                             | Survey study                                      | The semi-structured and opened questionnaire, descriptive quantitative analysis, content analysis |
| Gordon<br>(2002) <sup>20</sup>               | Canada<br><br>Drug Aging                                                     | Hospital, elderly people (3), relatives (4), doctors (3) | Overview the ethical issues at the end of life treatment, in Canada                                          | Qualitative, descriptive case study               | Case vignette, normative analysis                                                                 |
| Jonasson and Berterö<br>(2012) <sup>21</sup> | Sweden<br><br>International Journal of Older People Nursing                  | Hospital (1)<br><br>Elderly patients (22)                | Describe the ethical values experienced by the elderly people in interaction with nurses in Sweden           | qualitative, observational study, Grounded theory | Follow-up interviews, observation, constant comparative analysis                                  |
| Jonasson et al.<br>(2011) <sup>22</sup>      | Sweden<br><br>International Journal of Qualitative studies Health Well-being | Clinic (1)<br><br>Nurses (20)                            | Describe the ethical values experienced by nurses in interaction with the elderly in Sweden                  | A qualitative approach, Grounded theory           | Follow-up interviews, observation, constant comparative analysis                                  |

|                                         |                                                         |                                                         |                                                                                                                                               |                                                |                                                                                          |
|-----------------------------------------|---------------------------------------------------------|---------------------------------------------------------|-----------------------------------------------------------------------------------------------------------------------------------------------|------------------------------------------------|------------------------------------------------------------------------------------------|
| Jonasson et al.<br>(2010) <sup>23</sup> | Sweden<br><br>International Journal of Nursing Practice | Clinic (1)<br><br>Family members, (next of kin)14       | Identify and describe the governing ethical values that next of kin experience in interaction<br><br>with nurses at a geriatric clinic Sweden | A qualitative approach, Grounded theory method | Follow-up interviews, observation, constant comparative analysis                         |
| Kadioglu et al.<br>(2013) <sup>24</sup> | Turkey,<br><br>Geriatrics Gerontology International     | Primary health care centers Physicians (50) Nurses (36) | Determine the frequency rate of geriatric ethical problems                                                                                    | A quantitative, survey study                   | Questionnaire, descriptive statistics, and analysis of variance (ANOVA), factor analysis |

(continued)

**Appendix I.** (continued)

| <b>Author(s), (year)</b>                   | <b>Country, Journal</b>                                   | <b>Setting, sample</b>                                                            | <b>Aims of the study</b>                                                                | <b>Study approach, design</b>                                                   | <b>Data collection, data analysis</b>                             |
|--------------------------------------------|-----------------------------------------------------------|-----------------------------------------------------------------------------------|-----------------------------------------------------------------------------------------|---------------------------------------------------------------------------------|-------------------------------------------------------------------|
| Leino-Kilpi et al.<br>(2003) <sup>25</sup> | Finland, Spain, UK Greece, Germany,<br><br>Nursing Ethics | Hospitals, nursing homes, senior centers<br><br>Elderly people (573) Nurses (887) | Explore nurses and patients' perception of autonomy, privacy, and informed consent      | The quantitative survey, cross-sectional exploratory and correlational          | Questionnaires, statistical analysis                              |
| Leino-Kilpi et al.<br>(2003) <sup>26</sup> | Finland, Spain, UK Greece, Germany,<br><br>Nursing Ethics | Hospitals, nursing homes, senior centers<br><br>Elderly people (573) Nurses (887) | Compare nurses' with/to patients' perception of autonomy, privacy, and informed consent | Quantitative, comparative, cross-sectional exploratory and correlational design | Questionnaires, statistical analysis, T-test for the comparison   |
| Scott et al.<br>(2003) <sup>27</sup>       | Finland, Spain, UK Greece, Germany,                       | Hospitals, nursing homes, senior centers                                          | Compare nurses' with/to patients' perception of autonomy                                | Quantitative, comparative, cross-                                               | Questionnaires, , statistical analysis, T-test for the comparison |

|                                                     |                                                                 |                                                                                         |                                                                                                                  |                                                                                           |                                                                              |
|-----------------------------------------------------|-----------------------------------------------------------------|-----------------------------------------------------------------------------------------|------------------------------------------------------------------------------------------------------------------|-------------------------------------------------------------------------------------------|------------------------------------------------------------------------------|
|                                                     | Nursing Ethics                                                  | Elderly people (573)<br>Nurses (887)                                                    |                                                                                                                  | sectional exploratory and<br>correlational design                                         |                                                                              |
| Schopp et al.<br>(2003) <sup>28</sup>               | Finland, Spain,<br>UK Greece,<br>Germany,<br><br>Nursing Ethics | Hospitals, nursing<br>homes, senior centers<br><br>Elderly people (573)<br>Nurses (887) | Compare nurses' with/to<br>patients' perception of privacy                                                       | Quantitative,<br>comparative, cross-<br>sectional exploratory and<br>correlational design | Questionnaires, statistical<br>analysis, T-test for the<br>comparison        |
| Schopp et al.<br>(2003) <sup>29</sup>               | Finland, Spain,<br>UK Greece,<br>Germany,<br><br>Nursing Ethics | Hospitals, nursing<br>homes, senior centers<br><br>Elderly people (573)<br>Nurses (887) | Compare nurses' with/to<br>patients' perception of informed<br>consent                                           | Quantitative,<br>comparative, cross-<br>sectional exploratory and<br>correlational design | Questionnaires, statistical<br>analysis, T-test for the<br>comparison        |
| Lejman et al.<br>(2013) <sup>30</sup>               | Sweden<br><br>Nursing Ethics                                    | Nursing homes (10)<br><br>Nurses (10)                                                   | Describe how nurses act<br>ethically and legally during<br>coercive treatment of the elderly<br>people in Sweden | Qualitative, descriptive                                                                  | Semi-structured interviews,<br>content analysis (manifest<br>and latent)     |
| van Thiel and<br>van Delden<br>(2001) <sup>31</sup> | Netherlands<br><br>Nursing ethics                               | Nursing homes (50)<br><br>Physicians (31) Nurses<br>(94)                                | Explore the importance of the<br>respect for patient's autonomy<br>for the caregivers                            | Quantitative empirical                                                                    | Case vignette,<br>questionnaire, narrative<br>analysis, descriptive analysis |

(continued)

**Appendix I.** (continued)

| Author), (year) | Country,<br>Journal | Setting, sample | Aims of the study | Study approach,<br>design | Data collection, data<br>analysis |
|-----------------|---------------------|-----------------|-------------------|---------------------------|-----------------------------------|
|-----------------|---------------------|-----------------|-------------------|---------------------------|-----------------------------------|

|                                                |                                                      |                                                                                                                                                                         |                                                                                                                                      |                                            |                                                                              |
|------------------------------------------------|------------------------------------------------------|-------------------------------------------------------------------------------------------------------------------------------------------------------------------------|--------------------------------------------------------------------------------------------------------------------------------------|--------------------------------------------|------------------------------------------------------------------------------|
| Schaffer<br>(2007) <sup>32</sup>               | Norway<br><br>Nursing Ethics                         | Hospitals, nursing homes, hospices, day centers or homes, organizations<br><br>Nurses (17) Physicians (4) social worker (1) ministers (3) elders (6) family members (5) | Explore the ethical problems experienced by healthcare professionals, elders and family at the end of life decision-making in Norway | Qualitative study                          | Semi-structured interviews, ethical inquiry, qualitative content analyses    |
| Suhonen et al.<br>(2010) <sup>33</sup>         | Finland<br><br>Nursing Ethics                        | xxx                                                                                                                                                                     | Analyze the empirical studies which focus on ethics in nursing care for elderly people                                               | Literature review                          | Review of literature, critical analysis                                      |
| Randers and Mattiasson<br>(2004) <sup>34</sup> | Sweden<br><br>Journal of Advanced Nursing            | Rehabilitation units<br><br>Nurses (7) assistant nurses (23)                                                                                                            | Understand the relation between autonomy and integrity in patients- caregivers interaction                                           | Qualitative, participatory observational   | Participatory observation, deductive, theoretical analysis, content analysis |
| Råholm<br>(2012) <sup>35</sup>                 | Norway<br><br>International Journal for Human Caring | Nursing home (1)<br><br>Nurses (7)                                                                                                                                      | Understand the ethics of presence when bathing an elderly patient                                                                    | Qualitative, descriptive, explorative      | Focus group interviews<br>Phenomenological-hermeneutic analysis              |
| Martin and Bush<br>(2008) <sup>36</sup>        | USA<br><br>Neuro Rehabilitation                      | Home<br><br>Elderly person (1), relatives (1), doctors                                                                                                                  | Explore the ethical consideration in geriatric neuropsychology                                                                       | Qualitative case study, explorative        | Case vignette, decision-making model                                         |
| Tuckett<br>(2007) <sup>37</sup>                | Australia<br><br>International Nursing Review        | Nursing homes<br><br>Nurses<br><br>Elderly people                                                                                                                       | Describe the literature, work practices and the culture of the nursing home                                                          | A literature review of qualitative studies | Review                                                                       |

|                                        |                                                      |                                                                              |                                                                                                         |                            |                                      |
|----------------------------------------|------------------------------------------------------|------------------------------------------------------------------------------|---------------------------------------------------------------------------------------------------------|----------------------------|--------------------------------------|
| Stinson et al.<br>(2004) <sup>38</sup> | USA<br><br>Dimensions of<br>Critical Care<br>Nursing | Critical care unit<br><br>Nurse<br><br>Elderly patient (1), relatives<br>(3) | Explore legal issues, discuss<br>ethical guidelines, identify<br>techniques for conflicts<br>resolution | Case study,<br>explorative | Case vignette, normative<br>analysis |
|----------------------------------------|------------------------------------------------------|------------------------------------------------------------------------------|---------------------------------------------------------------------------------------------------------|----------------------------|--------------------------------------|

(continued)

**Appendix I.** (continued)

| <b>Author), (year)</b>                 | <b>Country, Journal</b>                            | <b>Setting, sample</b>                                                      | <b>Aims of the study</b>                                                                                                                                                                                        | <b>Study approach, design</b>       | <b>Data collection, data analysis</b>                                                                 |
|----------------------------------------|----------------------------------------------------|-----------------------------------------------------------------------------|-----------------------------------------------------------------------------------------------------------------------------------------------------------------------------------------------------------------|-------------------------------------|-------------------------------------------------------------------------------------------------------|
| Smith<br>(2005) <sup>39</sup>          | USA<br><br>Journal of<br>Gerontological<br>Nursing | Nursing home (1), senior<br>community center (1)<br><br>Elderly people (10) | Explore ethical issues in<br>institutions with elderly people                                                                                                                                                   | Qualitative, descriptive,           | Interviews, content analysis,<br>comparative analysis,<br>normative analysis, review of<br>literature |
| Bolmsjö et al.<br>(2006) <sup>40</sup> | Sweden<br><br>Nursing Ethics                       | Nursing homes (1)<br><br>Elderly people (12)<br><br>nurses                  | Describe and interpret the<br>general ethical milieu in a<br><br>nursing home for elderly<br>people and to use a decision-<br>making model to analyze<br><br>specific ethical situations<br>within this milieu. | Qualitative,<br>Observational study | Sandman teleological<br>decision-making model,<br>phenomenological, content<br>analysis               |



|                                             |                                                                                  |                                                                                            |                                                                                                                                                                                 |                                                                                  |                                                                                                                                         |
|---------------------------------------------|----------------------------------------------------------------------------------|--------------------------------------------------------------------------------------------|---------------------------------------------------------------------------------------------------------------------------------------------------------------------------------|----------------------------------------------------------------------------------|-----------------------------------------------------------------------------------------------------------------------------------------|
| Bužgová and Ivanová<br>(2011) <sup>41</sup> | Czech Republic<br>Nursing Ethics                                                 | Nursing homes (12),<br>elderly people (488) and<br>health caregivers (454)                 | Describe issues of elderly<br>abuse in institutional care                                                                                                                       | Quantitative survey,<br>research derived from<br>qualitative<br>phenomenological | Structured interviews,<br>questionnaires Descriptive<br>statistics comparative,<br>statistical, chi-squared<br>statistic, Fisher's test |
| Piers et al.<br>(2010) <sup>42</sup>        | 21 European<br>countries<br><br>Zeitschrift für<br>Gerontologie und<br>Geriatric | Hospitals, hospices,<br>home care, long-term<br>care institutions<br><br>Physicians (19)   | Map the palliative care<br>structures for geriatric<br>patients, policies, legislation,<br>associations in geriatric<br>palliative medicine in different<br>countries of Europe | quantitative survey,<br>descriptive comparative<br>research                      | Questionnaire, clinical case<br>vignette                                                                                                |
| Bond and Lowton<br>(2011) <sup>43</sup>     | England<br><br>Age and Ageing                                                    | Clinics<br><br>Physicians (10)                                                             | Elicit geriatricians' views on<br>advance decisions and their<br>use in decision-making                                                                                         | Qualitative approach,<br>case study                                              | Semi-structured interviews,<br>case vignettes, grounded<br>theory analysis, inductive<br>analysis                                       |
| Sammet<br>(2007) <sup>44</sup>              | Germany<br><br>Journal of Medical<br>Ethics                                      | Nursing homes<br><br>Nurses, elderly people<br>(2)                                         | Describe the judgments of<br>German courts on the care of<br>the elderly                                                                                                        | Qualitative case study<br>discussion                                             | Vignette cases, normative<br>analysis                                                                                                   |
| Hwang and Lin<br>(2003) <sup>45</sup>       | China<br><br>Journal of Nursing<br>Research                                      | Long-term care<br>institutions (26),<br>community centers (12)<br><br>Elderly people (324) | Investigate the perceived<br>enactment of autonomy and<br>related factors among<br>elderlies                                                                                    | Quantitative, cross-<br>sectional study                                          | Face to face questionnaire,<br>Cronbach's alpha,<br>descriptive analysis,<br>regression analysis                                        |

(continued)

**Appendix I.** (continued)

| Author), (year) | Country, Journal | Setting, sample | Aims of the study | Study approach,<br>design | Data collection, data<br>analysis |
|-----------------|------------------|-----------------|-------------------|---------------------------|-----------------------------------|
|-----------------|------------------|-----------------|-------------------|---------------------------|-----------------------------------|

|                                             |                                                              |                                                                                             |                                                                                                                       |                                              |                                                                                                               |
|---------------------------------------------|--------------------------------------------------------------|---------------------------------------------------------------------------------------------|-----------------------------------------------------------------------------------------------------------------------|----------------------------------------------|---------------------------------------------------------------------------------------------------------------|
| Matsui and Capezuti<br>(2008) <sup>46</sup> | USA<br><br>Geriatric Nursing                                 | Senior centers (6)<br><br>Elderly people (120)                                              | Investigate the perceived autonomy and self-care resources                                                            | Quantitative descriptive, correlation study  | Questionnaires, Cronbach` alpha coefficient, descriptive and correlation statistics                           |
| Scott et al.<br>(2003) <sup>47</sup>        | UK<br><br>British Journal of Nursing                         | Nursing home (7), long-term care institutions (15)<br><br>Nurses (155) elderly people (101) | Examine the ethical issues in the care of elderly patients in long-term care in (Finland, Spain, Greece, Germany, UK) | Quantitative survey comparative study        | Review of literature, Interviews, questionnaires, chi-squared test, Spearman test, Cronbach alpha coefficient |
| Zimring<br>(2006) <sup>48</sup>             | USA<br><br>Journal of American Medical Directors Association | elderly people (1), relatives (3)                                                           | Explore the current legal framework for health care decision making in the US                                         | Qualitative explorative case study           | Case vignettes, normative analysis                                                                            |
| Mayo and Wallhagen<br>(2009) <sup>49</sup>  | USA<br><br>Research in Gerontological Nursing                | xxx                                                                                         | Consider informed consent and decision-making competence in older adults with cognitive impairment                    | Review of literature                         | Review                                                                                                        |
| McBrien<br>(2007) <sup>50</sup>             | Ireland<br><br>Accident and Emergency Nursing                | Hospital<br><br>Elderly people (1), relatives (1), nurses                                   | Improve knowledge of nurses on ethical and legal issues when exercising restraint, in Ireland                         | Qualitative case study, theoretical overview | case vignette, critical analyses, concept analyses                                                            |
